# Supplementary material for: Anti-Inflammatory Diet Prevents Subclinical Colonic Inflammation and Alters Metabolomic Profile of Ulcerative Colitis Patients in Clinical Remission
Source: MDPI journal article supplement (doi:10.3390/nu14163294), 2022-08-11
Supplement: s1 [file s1]

**Table S1.** Comparison of changes in dietary intake of foods and nutrients from baseline to month 6 between the two diet groups.

|                               | AID              |                  | P-value <sup>1</sup> | CFG              |                  | P-value <sup>2</sup> | P-value <sup>3</sup> |
|-------------------------------|------------------|------------------|----------------------|------------------|------------------|----------------------|----------------------|
|                               | Baseline         | Month 1-6        |                      | Baseline         | Month 1-6        |                      |                      |
| Energy (kcal/d)               | 1882.4±52<br>4.7 | 1958.9±55<br>1.9 | 0.29                 | 1950.2±61<br>6.4 | 1911.5±56<br>8.5 | 0.45                 | 0.26                 |
| Protein (%E)                  | 16.2±4.3         | 17.3±3.3         | 0.32                 | 19.9±5.7         | 18.7±4.4         | 0.11                 | 0.21                 |
| Carbohydrate (%E)             | 49.4±8.4         | 49.8±8.9         | 0.78                 | 47.1±11.5        | 45.3±9.3         | 0.30                 | 0.31                 |
| Fat (%E)                      | 35.8±9.6         | 33.4±6.8         | 0.15                 | 33.5±7.5         | 34.5±8.3         | 0.37                 | 0.21                 |
| Fiber (g/d)                   | 20.2±6.6         | 22.8±6.7         | 0.04                 | 22.5±11.8        | 22.3±8.3         | 0.61                 | 0.09                 |
| Vitamin A (µg/d)              | 1018.1±79<br>4.1 | 1134.9±73<br>1.7 | 0.13                 | 1198.5±69<br>6.9 | 900.7±440.<br>2  | 0.03                 | 0.01                 |
| Niacin (mg/d)                 | 24.8±17.5        | 27.2±14.7        | 0.23                 | 29.2±10.0        | 27.8±11.1        | 0.27                 | 0.06                 |
| Zinc (mg/d)                   | 10.6±5.3         | 11.7±6.1         | 0.05                 | 17.7±11.7        | 16.1±8.0         | 0.45                 | 0.00                 |
| Phosphorus (mg/d)             | 1408.6±62<br>6.6 | 1561.4±54<br>8.8 | 0.05                 | 1571.9±63<br>7.3 | 1472.5±43<br>5.0 | 0.36                 | 0.02                 |
| Selenium (µg/d)               | 110.4±61.8       | 122.2±39.6       | 0.04                 | 128.4±36.6       | 121.6±25.7       | 0.34                 | 0.01                 |
| Choline (mg/d)                | 297.8±130.<br>8  | 334.5±118.<br>3  | 0.07                 | 367.6±176.<br>3  | 332.1±132.<br>3  | 0.46                 | 0.05                 |
| Seafood (ounce equivalents/d) | 0.7±1.2          | 1.4±1.5          | 0.01                 | 1.2±2.1          | 1.1±1.3          | 0.82                 | 0.07                 |
| Yogurt (cup equivalents/d)    | 0.3±0.3          | 0.5±0.3          | <0.01                | 0.1±0.2          | 0.2±0.2          | 0.28                 | 0.06                 |

<sup>1</sup> for comparison of baseline vs. month 6/relapse levels in the anti-inflammatory diet (AID) group; <sup>2</sup> for comparison of baseline vs. month 6/relapse levels in the Canada's Food Guide (CFG) group; <sup>3</sup> for comparison of changes from baseline to month 6/relapse between AID and CFG groups.

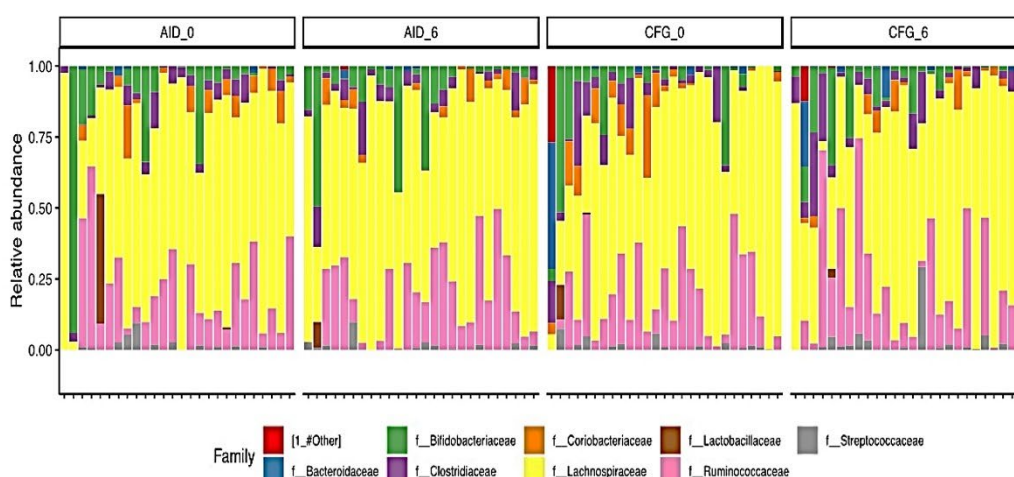

**Figure S1.** Gut bacterial composition (family level) in stool samples collected from patients randomized to the anti-inflammatory diet (AID) and Canada's Food Guide (CFG) groups at baseline (0) and at month 6 or time of relapse (6).

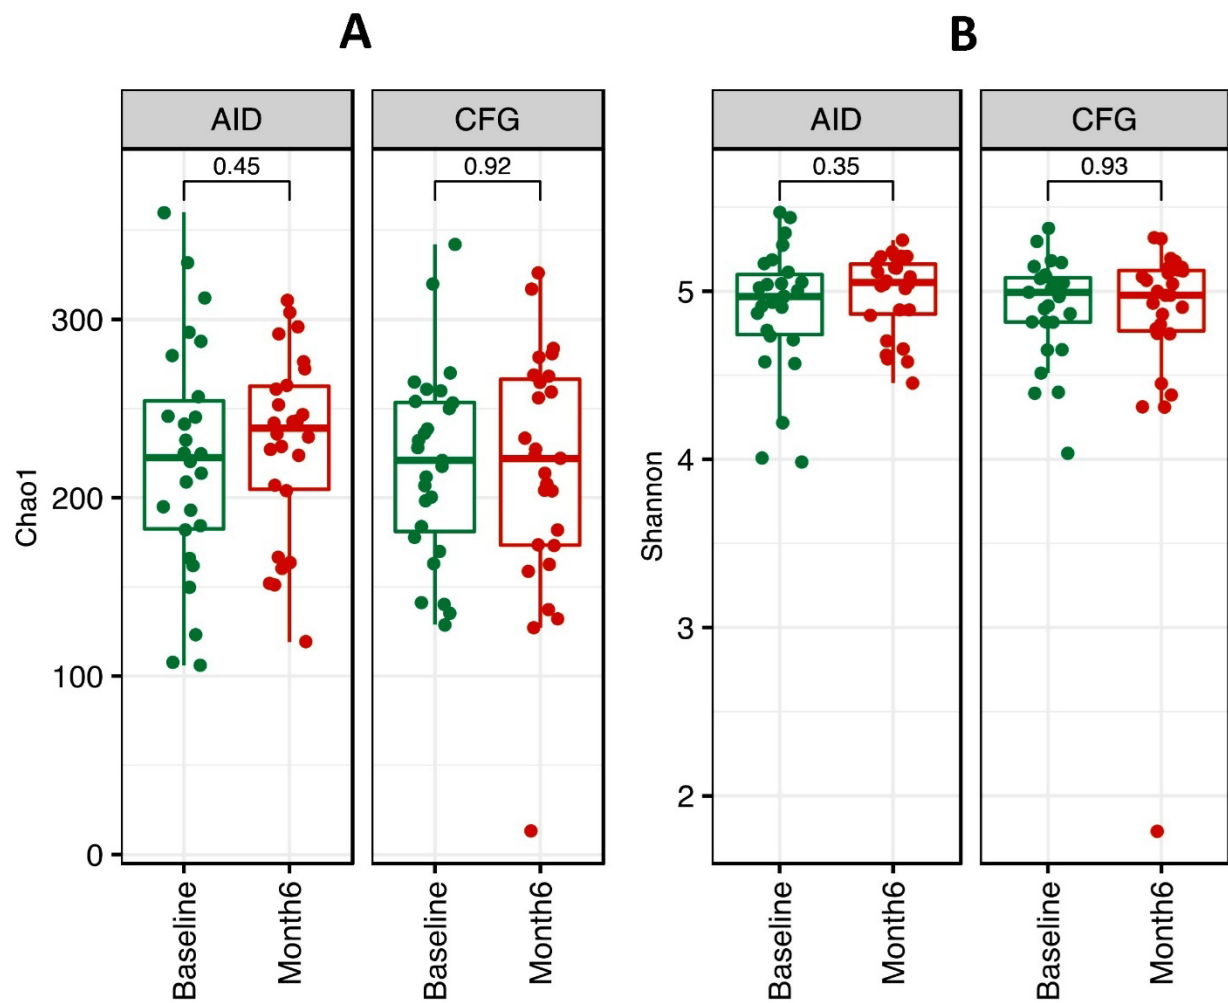

**Figure S2.** Comparison of alpha diversity scores from baseline to month 6 or time of relapse in patients randomized to the anti-inflammatory diet (AID) and Canada's Food Guide (CFG) groups showed no significant changes in either Chao1 (A) estimator or Shannon index (B).
